# Supplementary material for: Environment-friendly degradable zinc-ion battery based on guar gum-cellulose aerogel electrolyte
Source: Royal Society of Chemistry journal article supplement (doi:10.1039/d1bm01747k), 2022-01-01
Supplement: d1bm01747k1.pdf [file d1bm01747k1.pdf]

## Supporting information

### Environment-friendly degradable zinc-ion battery based on guar gum-cellulose aerogel electrolyte

Ran Xu,<sup>a,†</sup> Junjie Zhou,<sup>a,b,†</sup> Hongyu Gong,<sup>a,†</sup> Li Qiao,<sup>a</sup> Yuguo Li,<sup>a</sup> Dongwei Li,<sup>a,\*</sup> Meng Gao,<sup>a</sup> Guanchen Xu,<sup>a,\*</sup> Meng Wang,<sup>a</sup> Xiu Liang,<sup>a</sup> Xingshuang Zhang,<sup>a</sup> Mingfu Luo,<sup>a</sup> Hongbo Qiu,<sup>c</sup> Kang Liang,<sup>a,d</sup> Yong Li<sup>a,\*</sup>

<sup>a</sup> Advanced Materials Institute, Qilu University of Technology (Shandong Academy of Sciences), Jinan 250014, P. R. China

<sup>b</sup> Department of Medical Equipment, Shandong Cancer Hospital & Institute, Shandong First Medical University & Shandong Academy of Medical Sciences, Jinan, 250117, P. R. China

<sup>c</sup> Shandong Guoshun Construction Group Co., Ltd., Jinan 250300, P. R. China

<sup>d</sup> School of Chemical Engineering and Graduate School of Biomedical Engineering, The University of New South Wales, NSW 2052, Australia

<sup>†</sup> These author contributed equally to this work

\* Corresponding author

Email: [yongli@sdas.org](mailto:yongli@sdas.org) (Y. Li) [dwli@sdas.org](mailto:dwli@sdas.org) (D. Li) [gcxu@sdas.org](mailto:gcxu@sdas.org) (G. Xu)

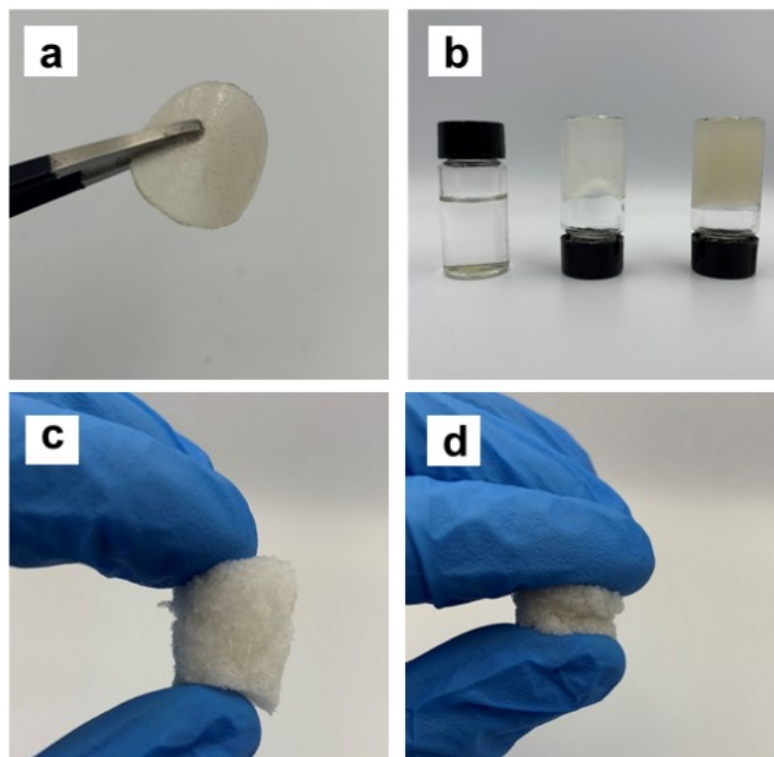

Fig. S1 Optical photos of guar gum and cellulose aerogel. (a) The guar gum electrolyte film. (b) The aqueous solutions of 2 M ZnSO<sub>4</sub> and 0.1 M MnSO<sub>4</sub>, guar gum and guar gum dissolved in the mixture solution of 2 M ZnSO<sub>4</sub> and 0.1 M MnSO<sub>4</sub>. (from left to right). (c) The cellulose aerogel. (d) The

compressed cellulose aerogel.

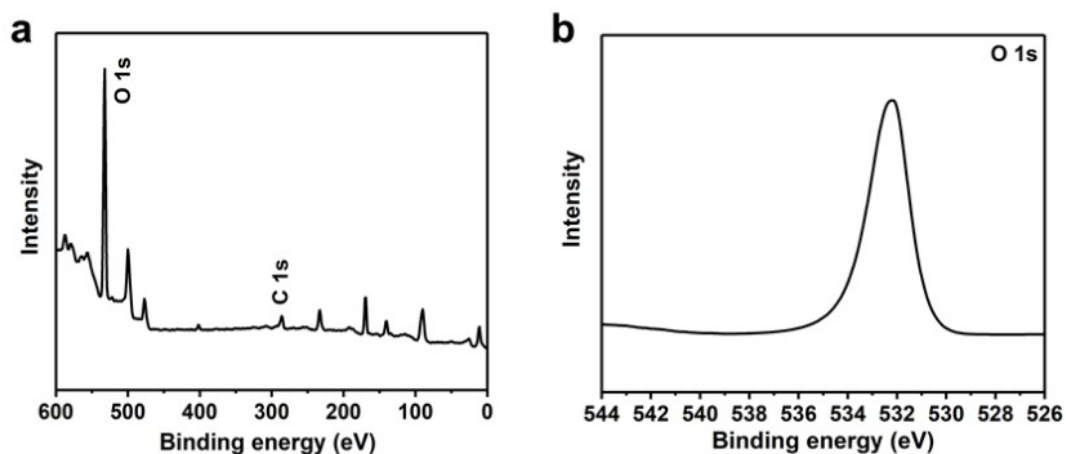

Fig. S2 (a) XPS survey spectra. (b) XPS of O 1s spectra of the GCA.

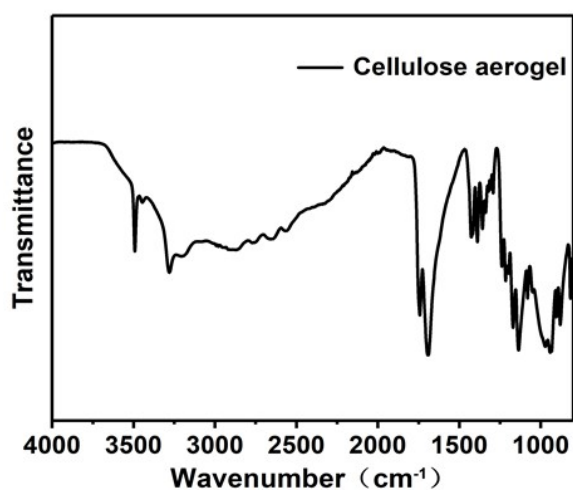

Fig. S3 FTIR spectra of the cellulose aerogel.

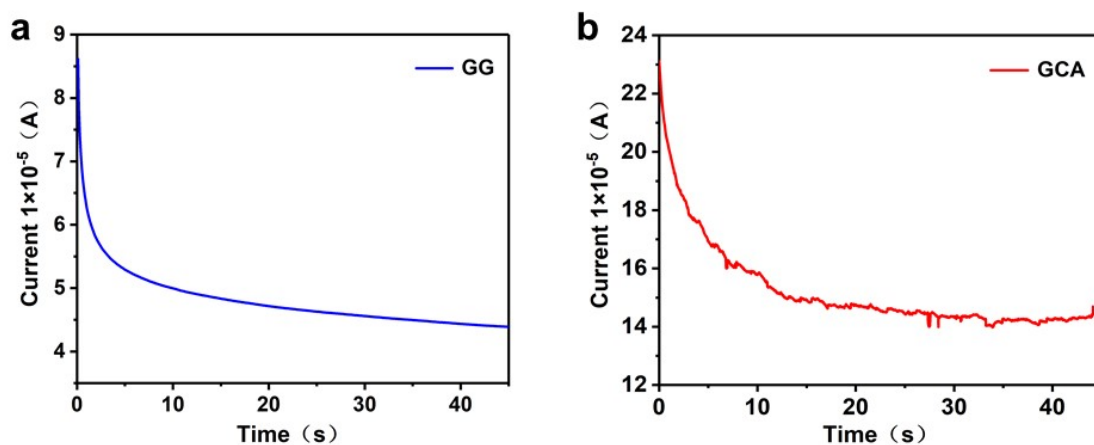

Fig. S4 (a) The i-t curve of GG. (b) The i-t curve of GCA.

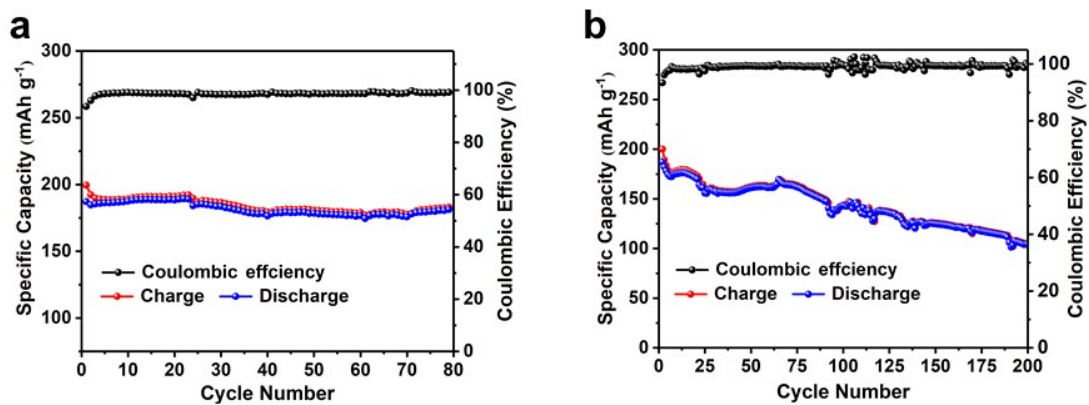

Fig. S5 Long-term cycling performance and the corresponding coulombic efficiency at 308 mA g<sup>-1</sup> use (a) zinc foil and (b) zinc particles.

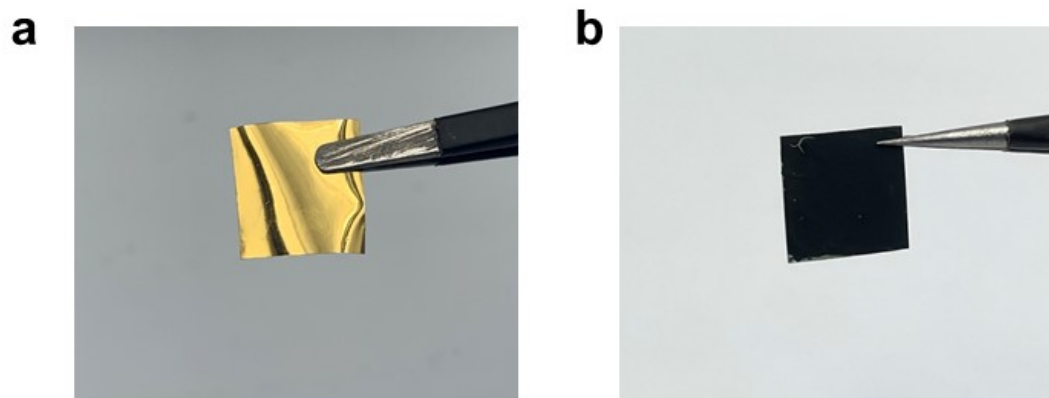

Fig. S6 The optical photos of the chitosan/Au film (a) and chitosan/Au film coated with  $\alpha$ -MnO<sub>2</sub>/CNT (b).

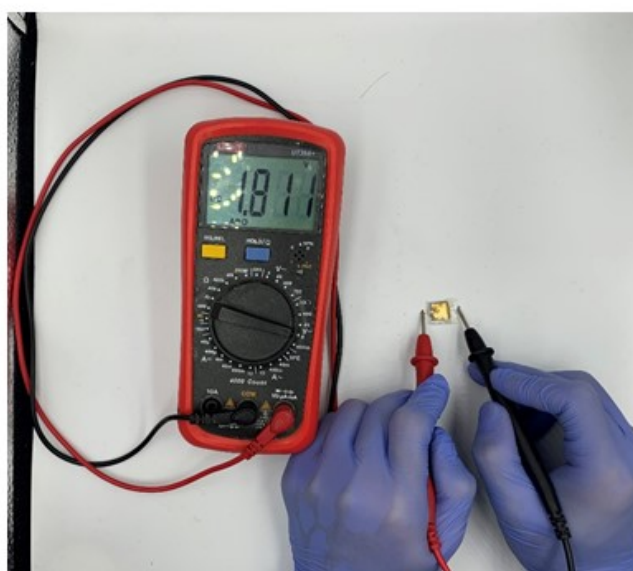

Fig. S7 The open-circuit voltage of the TZIB device.

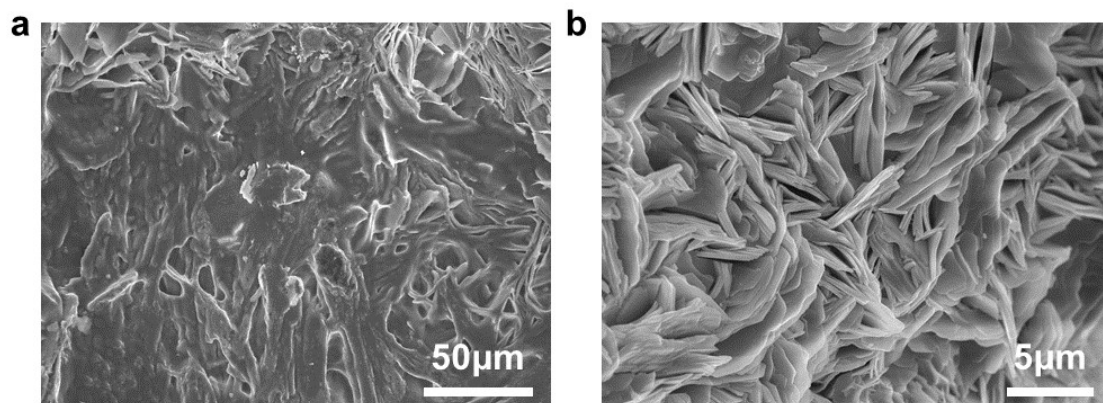

Fig. S8 (a) The SEM image of zinc particles in GCA after 200 cycles. (b) The SEM image of zinc particles in aqueous electrolyte after 200 cycles.

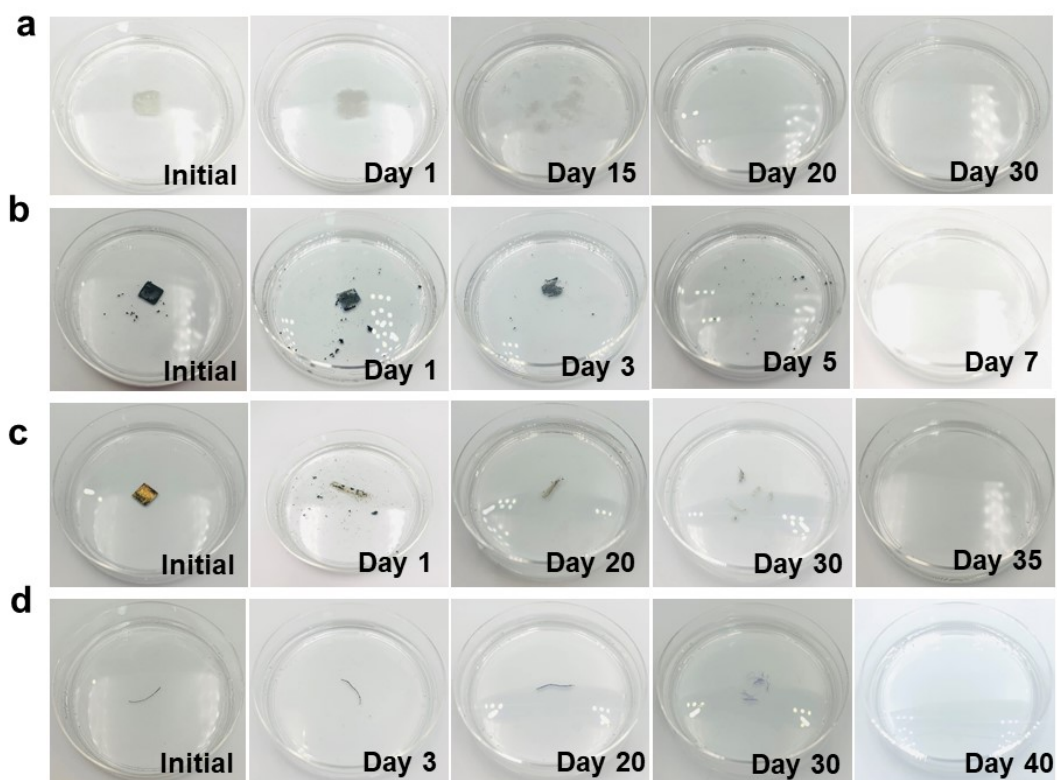

Fig. S9 The biodegradation profile of the GCA (a), silk fibroin coated with zinc microparticles (b), chitosan/Au film coated with  $\alpha$ -MnO<sub>2</sub>/CNT (c) and PGA/Au (d) in buffered protease solution at 45°C.
